# Supplementary material
Source: bioRxiv or medRxiv preprint supplement (https://www.medrxiv.org/highwire/filestream/96902/field_highwire_adjunct_files/6/2020.09.14.20192609-7.pdf)

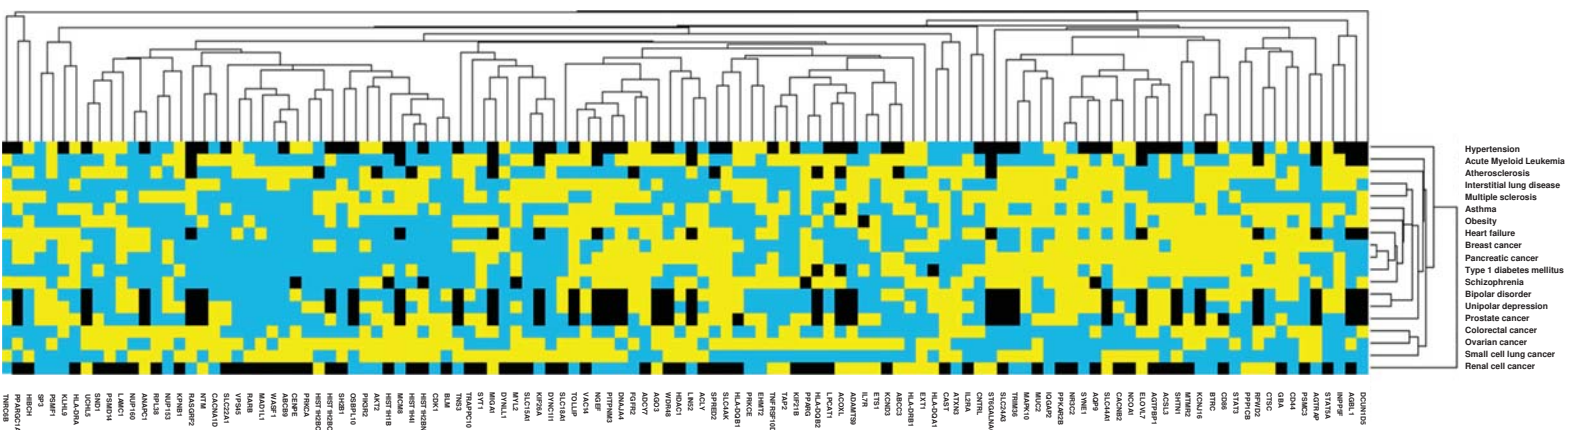

Supplement: Supplementary file [file 2020.09.14.20192609-7.pdf]
